# Supplementary material
Source: Copernicus journal article supplement (doi:10.5194/acp-26-7827-2026)
Supplement: Supplementary file 1 [file acp-26-7827-2026-supplement.pdf]

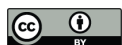

*Supplement of*

## **Synchronization of source and sink by boundary layer evolution: a key to new particle formation under varying ozone pollution**

**Yulin Wang et al.**

*Correspondence to:* Honglei Wang (hongleiwang@nuist.edu.cn) and Qun Hu (huqun\_h@163.com)

The copyright of individual parts of the supplement might differ from the article licence.

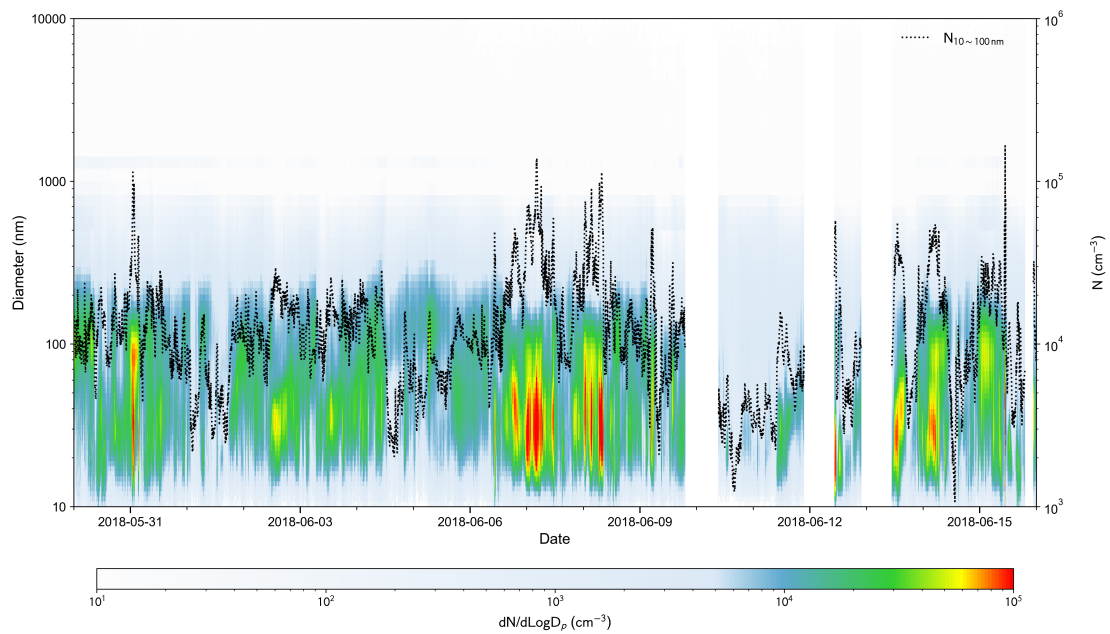

Figure S1. Time series of aerosol particle size distribution (0.1–10  $\mu\text{m}$ ) and number concentration of 10–100 nm particles from May 30 to June 15, 2018.

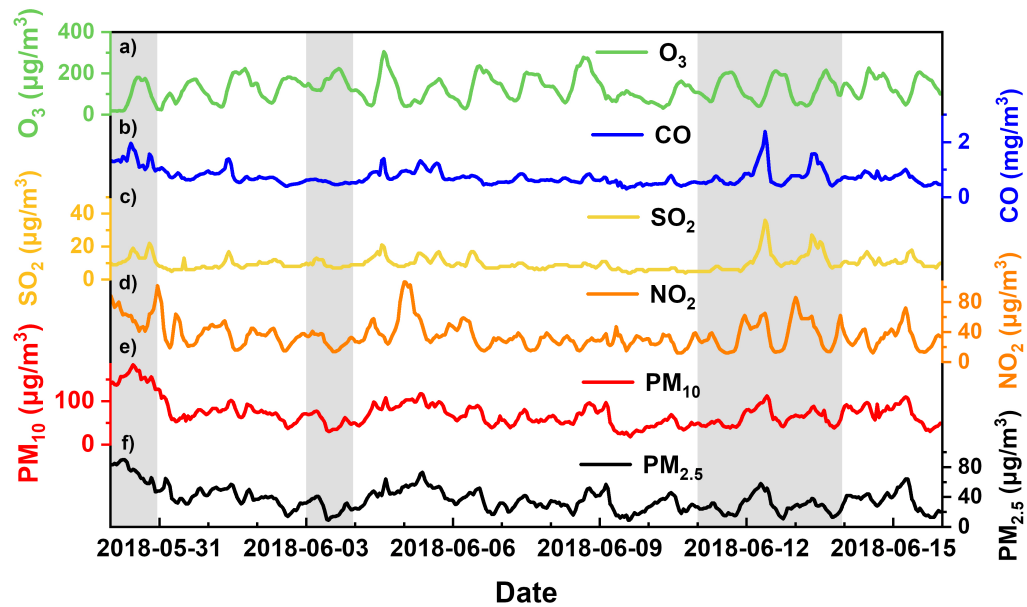

Figure S2. Time series of criteria air pollutants from May 30 to June 15, 2018: (a)  $\text{O}_3$ , (b)  $\text{CO}$ , (c)  $\text{SO}_2$ , (d)  $\text{NO}_2$ , (e)  $\text{PM}_{10}$ , and (f)  $\text{PM}_{2.5}$ .

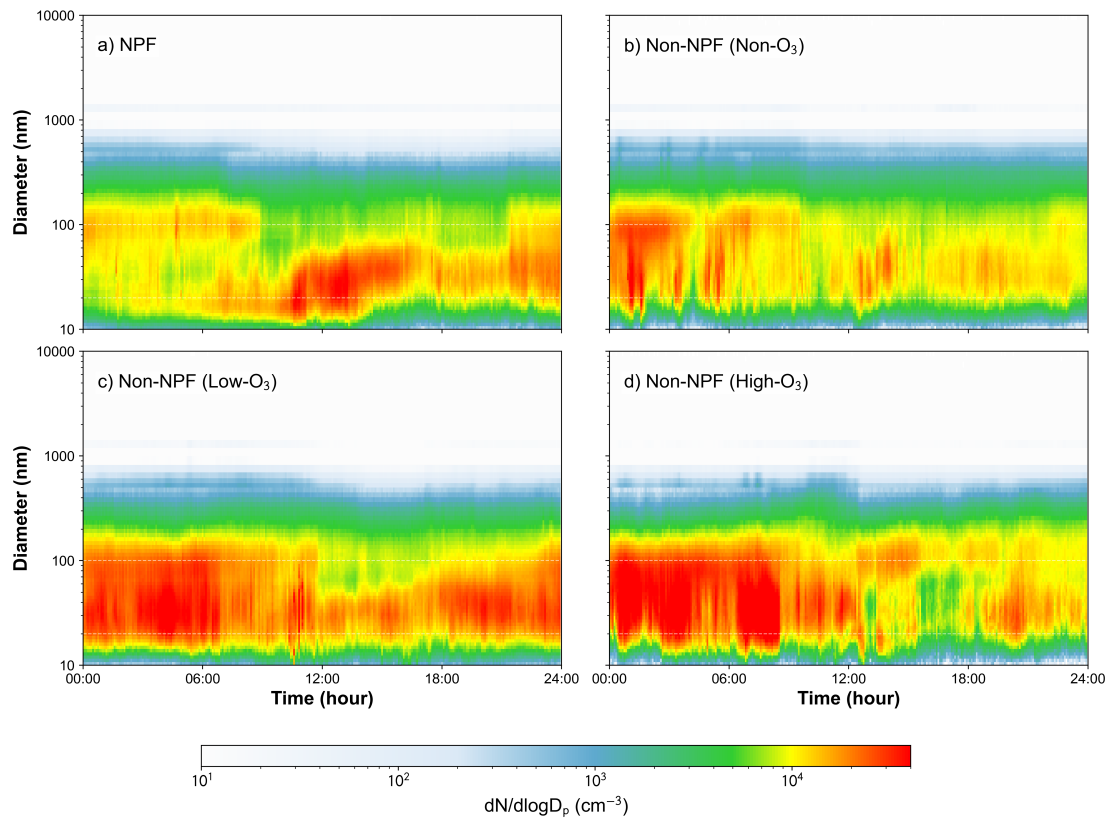

Figure S3. Size distribution of number concentration during observation time: (a) NPF scenario, (b) Non-NPF(Non-O<sub>3</sub>) scenario, (c) Non-NPF(Low-O<sub>3</sub>) scenario and (d) Non-NPF(High-O<sub>3</sub>) scenario.

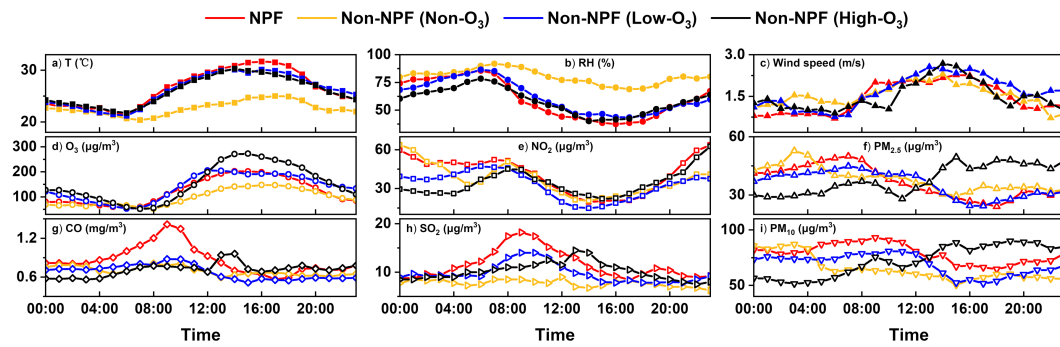

Figure S4. Diurnal variations of surface meteorological parameters and air pollutant concentrations under four classified scenarios: (a) T, (b) RH, (c) Wind speed, (d) O<sub>3</sub>, (e) NO<sub>2</sub>, (f) PM<sub>2.5</sub>, (g) CO, (h) SO<sub>2</sub>, and (i) PM<sub>10</sub>. The red, yellow, blue, and black lines represent the NPF, Non-NPF (Non-O<sub>3</sub>), Non-NPF (Low-O<sub>3</sub>) and Non-NPF (High-O<sub>3</sub>) scenarios, respectively.

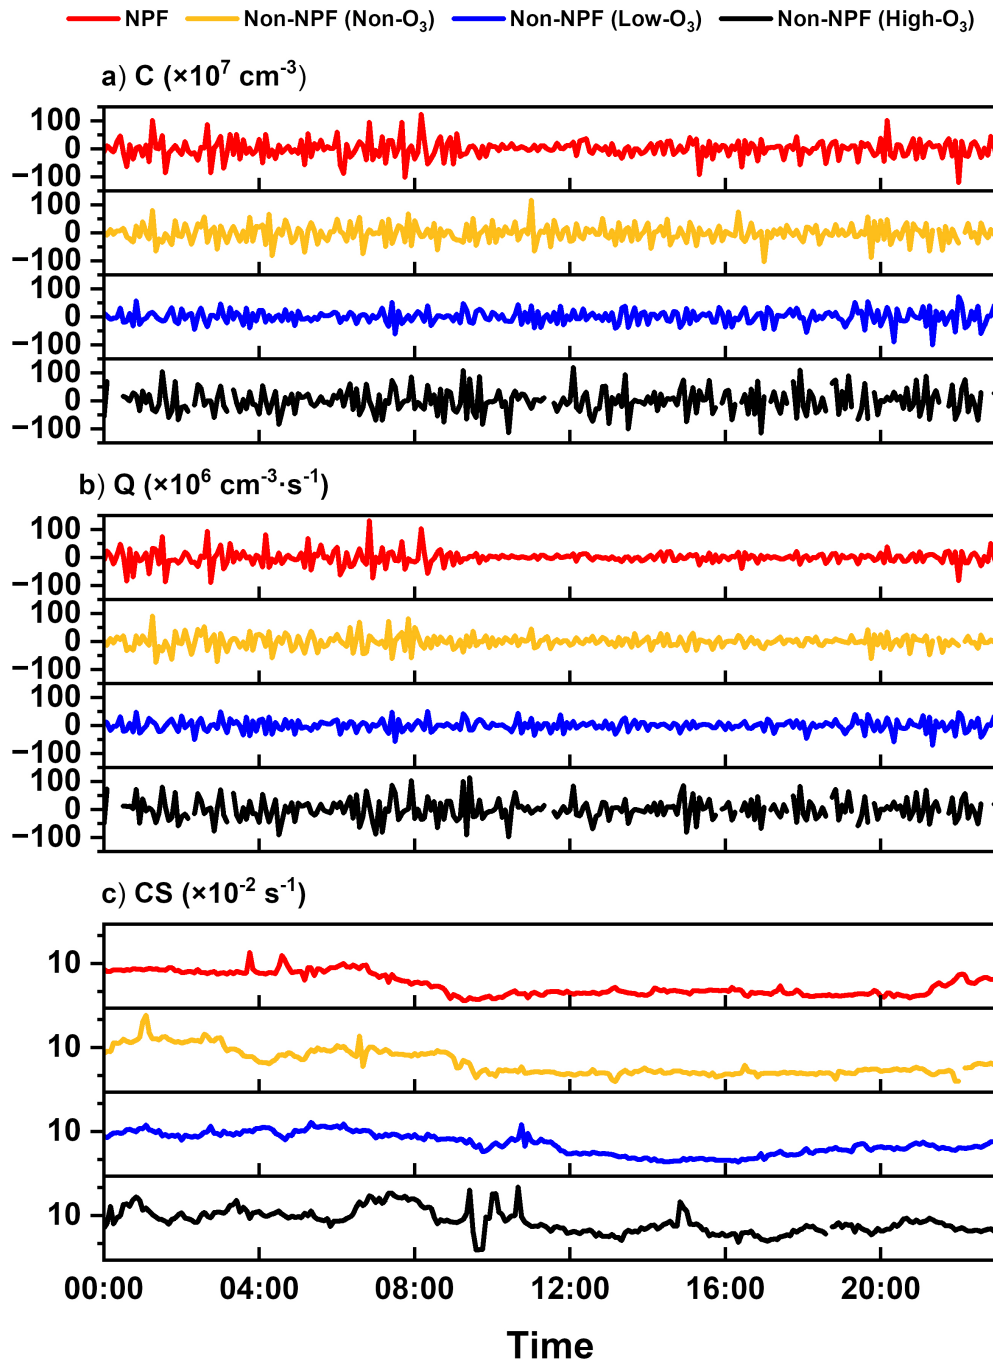

Figure S5. Diurnal variations of NPF dynamic parameters under four classified scenarios: (a) C, (b) Q, and (c) CS. The red, yellow, blue, and black lines represent the NPF, Non-NPF (Non-O<sub>3</sub>), Non-NPF (Low-O<sub>3</sub>) and Non-NPF (High-O<sub>3</sub>) scenarios, respectively.

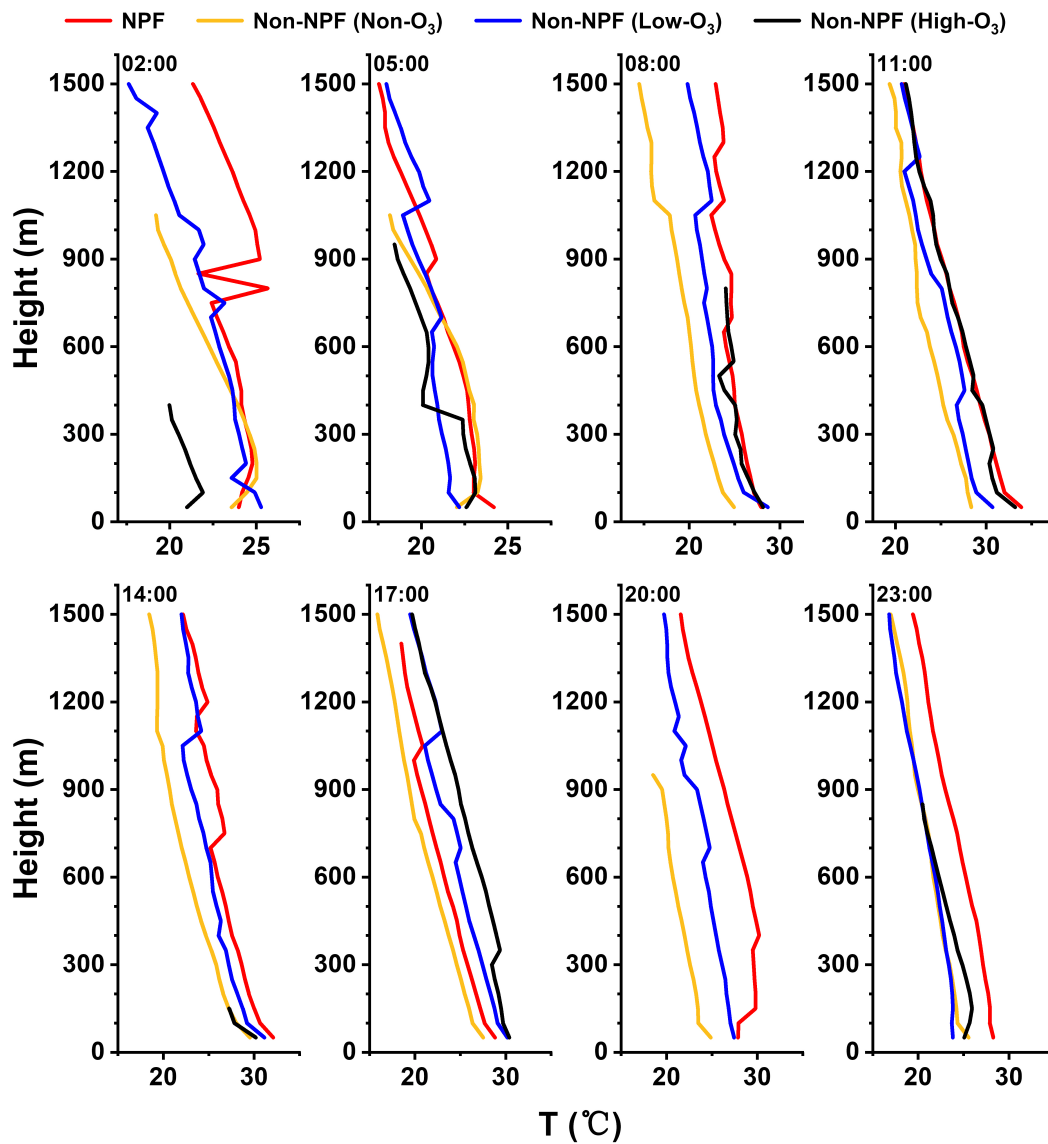

Figure S6. Vertical profiles of T at different times under four classified scenarios. The red, yellow, blue, and black lines represent the NPF, Non-NPF (Non-O<sub>3</sub>), Non-NPF (Low-O<sub>3</sub>) and Non-NPF (High-O<sub>3</sub>) scenarios, respectively.

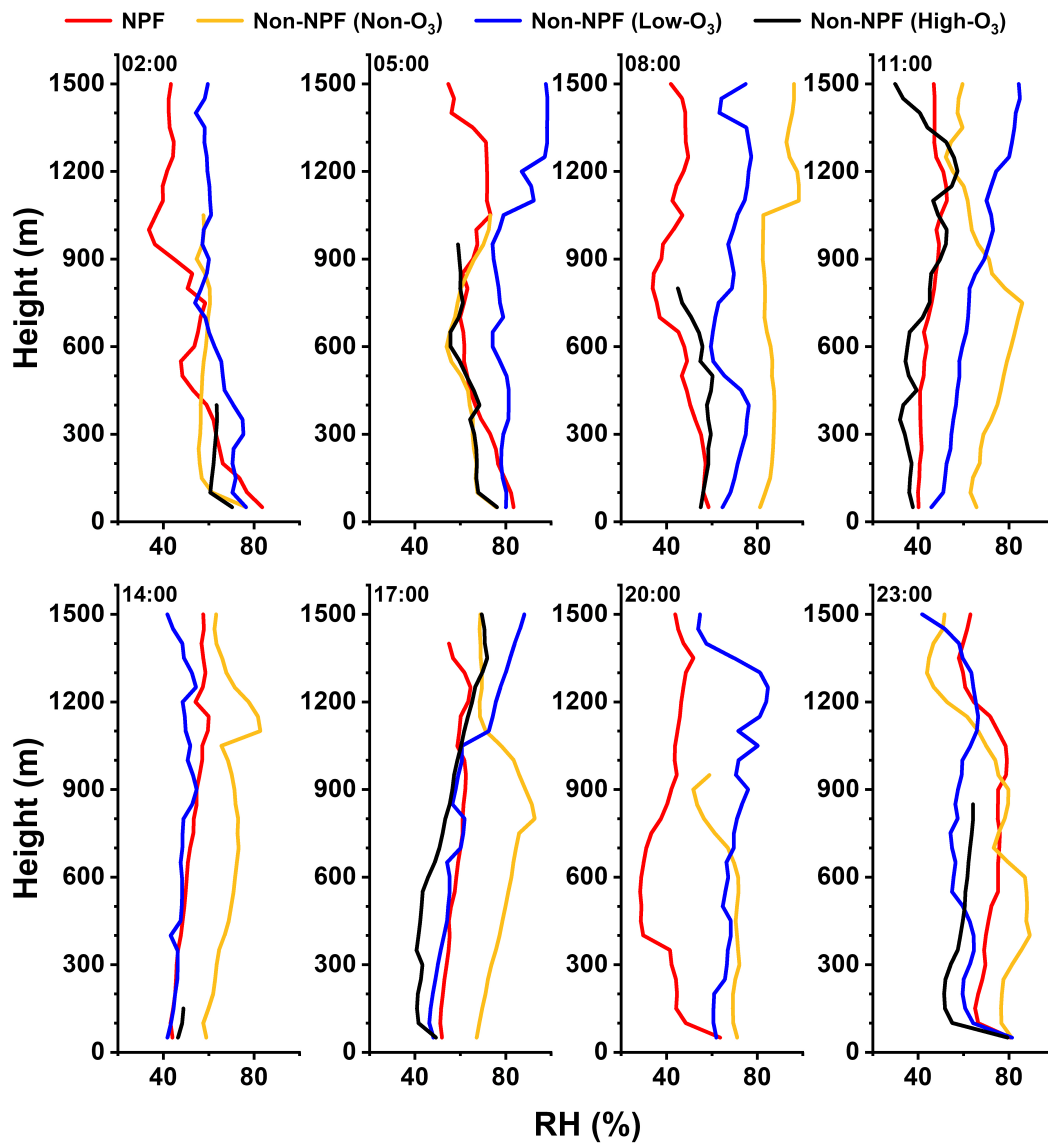

Figure S7. Vertical profiles of RH at different times under four classified scenarios. The red, yellow, blue, and black lines represent the NPF, Non-NPF (Non-O<sub>3</sub>), Non-NPF (Low-O<sub>3</sub>) and Non-NPF (High-O<sub>3</sub>) scenarios, respectively.

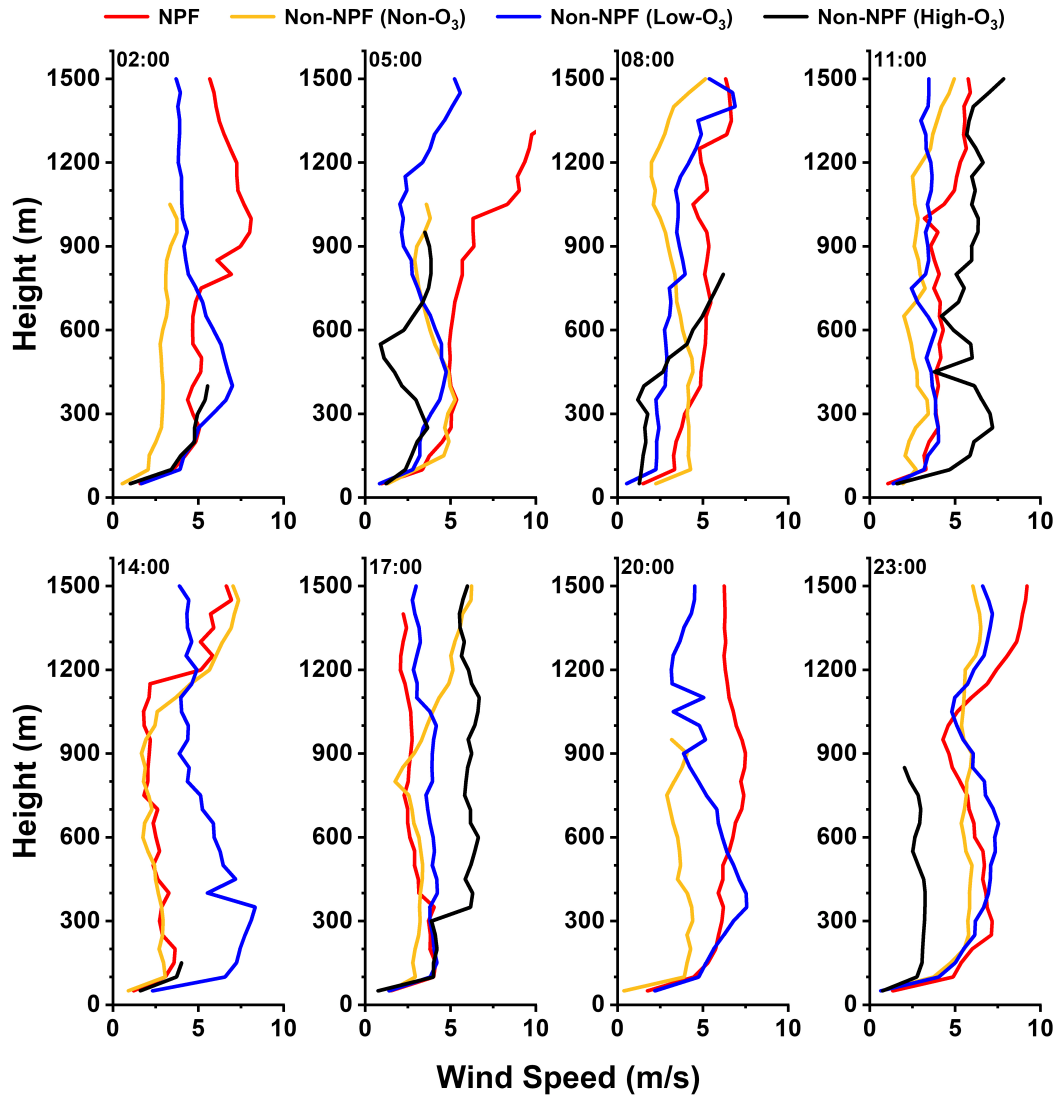

Figure S8. Vertical profiles of wind speed at different times under four classified scenarios. The red, yellow, blue, and black lines represent the NPF, Non-NPF (Non-O<sub>3</sub>), Non-NPF (Low-O<sub>3</sub>) and Non-NPF (High-O<sub>3</sub>) scenarios, respectively.

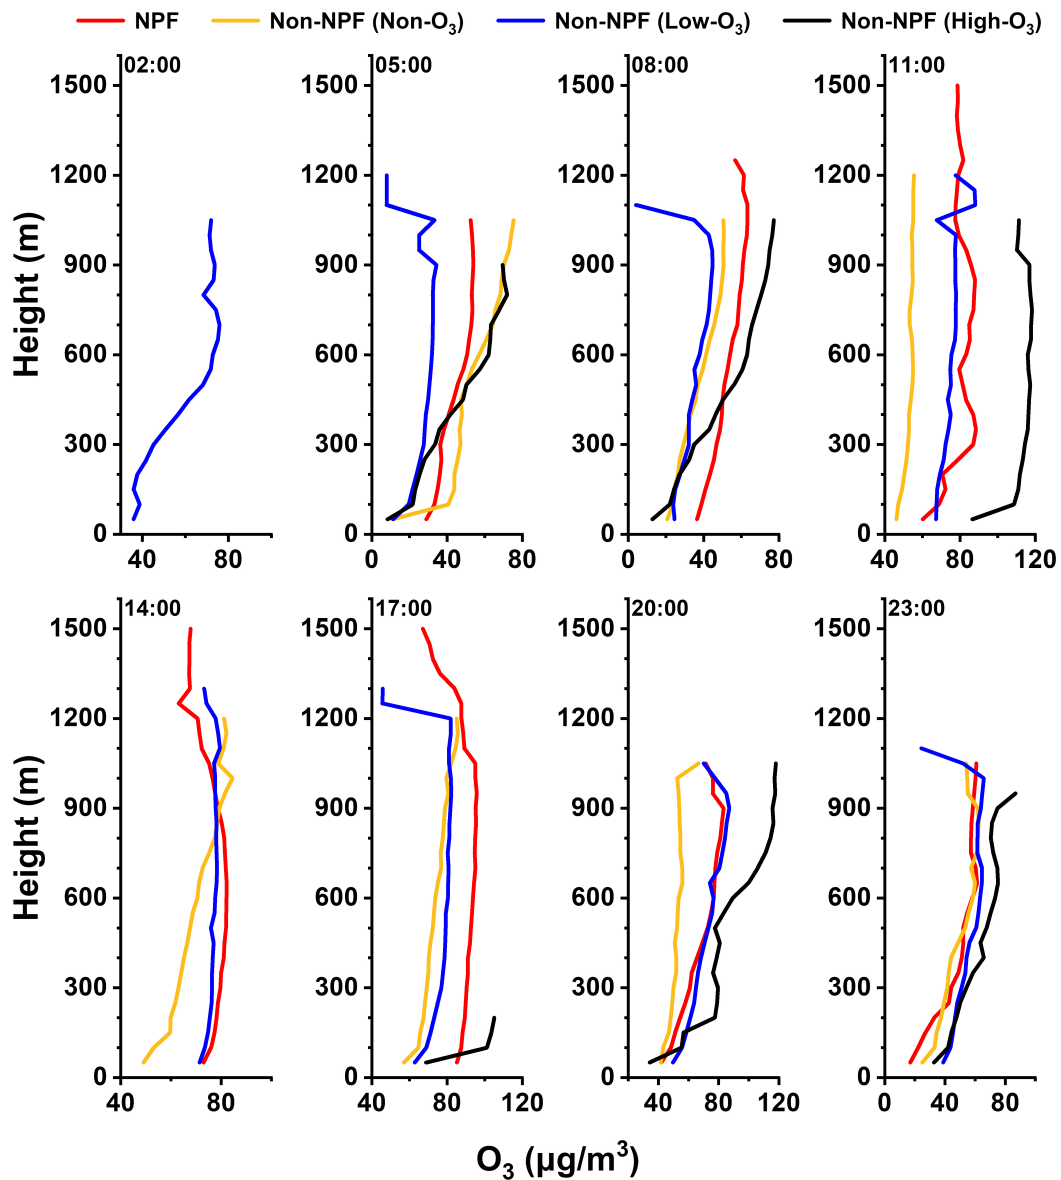

Figure S9. Vertical profiles of  $O_3$  concentrations at different times under four classified scenarios. The red, yellow, blue, and black lines represent the NPF, Non-NPF (Non- $O_3$ ), Non-NPF (Low- $O_3$ ) and Non-NPF (High- $O_3$ ) scenarios, respectively.
